# Supplementary material for: Severe burn injury in europe: a systematic review of the incidence, etiology, morbidity, and mortality
Source: Crit Care. 2010 Oct 19;14(5):R188. doi: 10.1186/cc9300 (PMC3219295; doi:10.1186/cc9300)
Supplement: Additional file 1 — Overview table of all 76 included studies. BOBI, Belgian Outcome in Burn Injury Study Group; P, Prospective; R, Retrospective; ED, Emergency Department; n.r., not reported; S, Survivors; NS, Non-survivors; M, male; F, Female; *All national (paediatric) burn units. **Nationwide data: based on national registers or registration systems and so on (may also include hospitals without specialized burn unit); °Pediatric surgical departments; #also includes patients with secondary diagnosis of burns; +only patients with burns and inhalation injury. Incidence trends reported as increase (↗) or decrease (↘) in incidence (and/or annual number of admitted patients). Mortality trends reported as increase (↗) or decrease (↘). [file cc9300-S1.XLS]

## Sheet: All included studies
Study Characteristics								Population characteristics				Occurence Rate and Outcome						Patient characteristics			Etiology
Author	Year	Country	HDI	Period	P/R	Setting	Number of centres	Hospitalised patients with burns (n)	Age group	Reported by subgroup(s)	Exclusion criteria	Incidence (/10.000/y and trends)		Proportion Hospitalised	Mortality (% and trends)		Age: (a) mean; (b) median	TBSA: (a) mean; (b) median	Inhalation	Gender %men	Flames/ explosion	Scalds/ steam	Contact	Chemical	Electrical
BOBI	2009	Belgium	0.953	1999-2004	R	BU	6*	6227	All	-	-	1.0	-	n.r.	4.6	-	(b) 34	(a) 11	9.4	n.r.	n.r.	n.r.	n.r.	n.r.	n.r.
Brusselaers	2009	Hungary	0.879	1998-2006	R	BU	1	2326	All	-	-	2.1	-	n.r.	1.4	-	(a) 35	(a) 11	0.3	54	n.r.	n.r.	n.r.	n.r.	n.r.
Onarheim	2009	Norway	0.971	2007-2007	R	All national Hospitals (ICD)	1*	726	All	-	Eye or chemical/electrical burns or only inhalation injury, discharged <24h	1.6	-	-	2.1	-	(a) 27, (b) 21	n.r.	n.r.	65	n.r.	n.r.	n.r.	n.r.	n.r.
Papp	2009	Finland	0.959	1994-2006	R	BU	1	1000	All	-	-	0.7	↘	-	4.0	-	(b) 39	(b) 3.5	2.7	73	32	37	25	3	2
Bloemsma	2008	Netherlands	0.964	1996-2006	R	BU	1	1946	All	-	-	n.r.	-	n.r.	6.9	↘	(a) 29 (S=26, NS=58)	(a) 11 (S=9; NS=29)	12.5	n.r.	48	43	5	2	<0.5
Rimdeika	2008	Lithuania	0.87	1991-2004	R	All national Hospitals	**	28472	All	-	-	4-7	↘	21.5	0.3	↘	n.r.	n.r.	n.r.	67	n.r.	n.r.	n.r.	n.r.	n.r.
Akerlund	2007	Sweden	0.963	1987-2004	R	All national Hospitals (ICD)	**	24538	All	-	-	1.6	↘	n.r.	3.0	↘	n.r.	n.r.	n.r.	69	n.r.	n.r.	n.r.	n.r.	n.r.
Sanchez	2007	Spain	0.955	1997-2001	P	BU	1	898	All	-	-	n.r.	-	n.r.	n.r.	-	n.r.	n.r.	n.r.	64	46	40	5	4	5
Babik	2006	Slovakia	0.88	1990-2004	R	BU	2*	1649	All	-	-	n.r.	↘	n.r.	3.0	↘	n.r.	n.r.	n.r.	n.r.	n.r.	n.r.	n.r.	n.r.	n.r.
Aldemir	2005	Turkey	0.806	1994-1999	R	BU	1	980	All	-	-	0.2	-	n.r.	6.3	-	(a) 11	(a) 24	n.r.	33	20	63	n.r.	n.r.	17
Brusselaers	2005	Belgium	0.953	1985-2004	R	BU	1	1385	All	-	-	0.3	-	n.r.	7.1	↘	(b) 30	(a) 19	12.0	n.r.	49	36	3	8	3
Da Silva	2003	Portugal	0.909	1993-1999	R	All national Hospitals (ICD)	**	14797	All	-	-	2.1	↘	n.r.	3.7	-	(a) 30	n.r.	n.r.	59	n.r.	n.r.	n.r.	n.r.	n.r.
Anlatici	2002	Turkey	0.806	1988-1997	R	ICBU	1	1083	All	-	-	n.r.	-	n.r.	33.5	↘	(a) 18	(a) 31; (b) 25	n.r.	70	51	9	n.r.	n.r.	40
Griffe	2001	France	0.961	1987-1999	R	BU	1	1929	All	-	-	n.r.	-	n.r.	8.0	-	(a) 33	(a) 17	n.r.	68	n.r.	n.r.	n.r.	n.r.	n.r.
Rashid	2001	UK	0.947	1979-1998	R	BU	1	7139	All	-	Isolated electrical or inhalation injury	n.r.	-	n.r.	6.0-6.5	-	(a) 24, (b) 18	(a) 11	n.r.	n.r.	n.r.	n.r.	n.r.	n.r.	n.r.
Sarhadi_1	2001	UK-Scotland	0.947	1981-1993	R	BU + scotish hospitals (ICD)	1	2771	All	Flame burns (n=1181)	-	n.r.	↘	n.r.	n.r.	↘	n.r.	n.r.	n.r.	65	43	26	13	3	5
Den Hertog	2000	Netherlands	0.964	1991-1996	R	3 national registers + 1 national survey	**	n.r.	All	Agegroups	-	0.8	↘	7	range 2-27	-	n.r.	n.r.	n.r.	64	22	52	17	n.r.	n.r.
Gomze-Cia	1999	Spain	0.955	1993-1997	R	BU	1	1000	All	-	-	n.r.	-	n.r.	6.6	-	(a) 33	(a) 17	n.r.	n.r.	n.r.	n.r.	n.r.	n.r.	n.r.
Hove	1999	Norway	0.971	1989-1989	P	BU	1*	15	All	-	-	0.7	-	4	n.r.	-	(a) 24 (M=20, F=30)	n.r.	n.r.	59	21	48	26	0.8	1.1
Wilkinson	1998	UK	0.947	1994-1995	R	All hospitals of oxfordshire (ICD)	9(ER)	352	All	-	-	1.4	-	11	n.r.	-	n.r.	n.r.	n.r.	68	n.r.	n.r.	n.r.	n.r.	n.r.
Germann	1997	Germany	0.947	1985-1990	R	BU	1	498	All	-	-	n.r.	-	n.r.	28.3	-	(a) S=35, NS=50	(a) S=20, NS=50	43.0	76	n.r.	n.r.	n.r.	n.r.	n.r.
Turegun	1997	Turkey	0.806	1986-1995	R	BU	1	800	All	(i)Civilians;(ii)Military	-	n.r.	-	n.r.	18.2	-	n.r.	n.r.	16.7	56 (i.:49; ii.:99)	(i)52;(ii)68	(i)33;(ii)14	(i)2; (ii)0.7	(i)0; (ii)1	(i)13,(ii)16
Coste	1996	France	0.961	1987-1994	P	BU	23*	1668	All	-	-	n.r.	-	n.r.	8.5	-	(a) S=40, NS=61	(a) S=17,NS=48	n.r.	n.r.	n.r.	n.r.	n.r.	n.r.	n.r.
Perro	1996	France	0.961	1987-1994	R	BU	1	2000	All	-	-	1.4	-	n.r.	9.7	-	n.r.	(a) 16	n.r.	66	54	24	7	5	8
Raff	1996	Germany	0.947	n.r. (5y)	R	BU	1	498	All	-	-	n.r.	-	n.r.	7.4	-	(a) S=35, NS=50	(a) 29	43.0	76	n.r.	n.r.	n.r.	n.r.	n.r.
Herruzo-Cabrera_1	1995	Spain	0.955	1971-1991	R	BU (critical care area)	1	2859	All	-	-	n.r.	-	n.r.	9.1	↘	(a) NS=47-53	(a) NS=44-48	31.4	n.r.	NS=74	n.r.	n.r.	n.r.	NS=12
Sarhadi_2	1995	UK-Scotland	0.947	1970-1992	R	All national Hospitals (ICD)	**	51350#	All	-	-	n.r.	↘	n.r.	n.r.	↘	n.r.	n.r.	n.r.	n.r.	n.r.	n.r.	n.r.	n.r.	n.r.
Koller	1994	Slovakia	0.88	1989-1993	R	BU	1	1049	All	-	-	n.r.	-	n.r.	7.3	-	n.r.	(a) 16	n.r.	n.r.	36	43	8	4	n.r.
Reig	1994	Spain	0.955	1988-1990	R	BU	1	302	All	-	TBSA <30%	n.r.	-	n.r.	30.8	-	(a) 43	(a) 55	n.r.	73	88	9.6	n.r.	n.r.	n.r.
Stravropoulou	1993	Greece	0.942	1989-1992	R	BU	1	342	All	-	Electrical and Chemical burns	n.r.	-	n.r.	14.6	-	n.r.	n.r.	7.9	59	n.r.	n.r.	n.r.	n.r.	n.r.
Tejerina	1992	Spain	0.955	1989-1989	R	BU	1	146	All	-	-	n.r.	-	8	n.r.	-	(a) 31	(a) 16	n.r.	69	59	27	3	9	n.r.
Benito-Ruiz	1991	Spain	0.955	1985-1988	R	BU	1	710	All	-	-	n.r.	-	n.r.	6.6	-	(a) NS=54	n.r.	4.1	66	89	4.2	2.1	2.1	n.r.
Laing	1991	UK	0.947	1989-1990	R	BU	1	100	All	-	-	n.r.	-	n.r.	n.r.	-	n.r.	n.r.	n.r.	n.r.	n.r.	n.r.	n.r.	n.r.	n.r.
Van Rijn	1991	Netherlands	0.964	1988-1989	R	BU	1	844	All	-	-	2.9	-	8	n.r.	-	n.r.	n.r.	n.r.	66	n.r.	n.r.	n.r.	n.r.	n.r.
Barisoni	1990	Italy	0.951	(5y)	R	BU	1	2615	All	-	-	n.r.	-	n.r.	5.5	-	n.r.	n.r.	n.r.	64	n.r.	n.r.	n.r.	n.r.	n.r.
Santos Heredero	1990	Spain	0.955	1986-1987	R	BU	1	194	All	-	-	n.r.	-	n.r.	25.2	-	(a) 40	(a) 40	42.5	72	n.r.	n.r.	n.r.	n.r.	n.r.
Elberg	1987	Denmark	0.955	1968-1984	R	BU	1	1391	All	-	-	n.r.	↘	n.r.	4.3	↘	n.r.	n.r.	n.r.	72	38	41	11	6	4
Hytonen	1987	Finland	0.959	1980-1980	R	All national Hospitals (ICD)	**	1296	All	-	-	2.7	↘	n.r.	1.4	-	(a) 30, (b) 27	n.r.	n.r.	70	15	43	n.r.	n.r.	3
Clark	1986	UK-Scotland	0.947	n.r. (1.5y)	R	BU	1	92⁺	All	-	-	n.r.	-	n.r.	21.5 (inhal.)	-	(a) 27	n.r.	100	76	n.r.	n.r.	n.r.	n.r.	n.r.
Lyngdorf	1986	Denmark	0.955	1982-1983	P	ED/hospital	1	75	All	-	-	n.r.	↘	5	6.0	-	n.r.	n.r.	n.r.	56 (ED)	18(ED)	53(ED)	21(ED)	5(ED)	0.2(ED)
Galeiras	2009	Spain	0.955	1992-2005	P	intensive care BU	1	851	Adults	-	-	n.r.	-	n.r.	17.6	↘	(a) 46	(a) 20; (b) 28	43.0	70	87	7	n.r.	n.r.	n.r.
Andel	2007	Austria	0.955	2002-2004	R	BU	1	365	Adults	-	-	n.r.	-	n.r.	24.0	-	(b)S=41, NS=58	(b)S=12; NS=45	18.4	S=28; NS=32	n.r.	n.r.	n.r.	n.r.	n.r.
Barrett	1999	Spain	0.955	1989-1995	R	BU	1	2772	Adults	-	-	0.7	-	22	3.5	-	(a) 40	(a) 16	7.0	64	59	25	6	2	12
Zoch_1	1992	Austria	0.955	1980-1990	R	BU	1	573	Adults	(i)'80-'88;(ii) '89-'90	-	n.r.	-	n.r.	23.9	↘	(a) 40-45	(a) (i)40.1; (ii)44.9	13.1	(i)66; (ii)68	n.r.	n.r.	n.r.	n.r.	n.r.
Herruzo-Cabrera_2	1991	Spain	0.955	1985-1987	R	BU	1	193	Adults (>16)	-		n.r.	-	n.r.	n.r.	-	n.r.	n.r.	n.r.	n.r.	n.r.	n.r.	n.r.	n.r.	n.r.
Celko	2008	Czech Rep.	0.903	1993-2006	R	BU	1	1064	0-16	-	-	8.5	-	n.r.	n.r.	-	(a)M=4.8,F=3.9, (b)M=2.9,F=2.2	n.r.	n.r.	64	n.r.	n.r.	n.r.	n.r.	n.r.
Papp	2008	Finland	0.959	1994-2004	R	BU	2	45	0-16	-	<48h hospitalised	0.01	-	-	0	-	(b) 5	(b) 26	68.8	76	36	44	n.r.	n.r.	20
Rawlins	2007	UK	0.947	2003-2004	R	ED	1	14	0-16	-	-	n.r.	-	3	0	-	(a) 5	(a) 2	n.r.	65	11	51	36	n.r.	n.r.
Dempsey	2006	Ireland	0.965	2003-2004	R	ED/BU	1	126	0-15	(i) Non-asylum, (ii) asylum seekers	-	n.r.	-	n.r.	0	-	(a) (i)5.5,(ii)1.5	(b) 5	n.r.	(i)68;(ii)43	(i.)22.(ii.)9	(i.)49;(ii.)93	14	3	2
Zamecnikova	2005	Czech Rep.	0.903	1999-2003	R	BU	1	580	0-15	4 age categories	-	n.r.	-	n.r.	n.r.	-	n.r.	n.r.	n.r.	63	No overall percentages reported (only per agegroup)
Elisdottir	1999	Iceland	0.969	1982-1995	R	Pediatric Dept. (only referral centre for paediatric burn treatment in Iceland)	1	290	0-15	-	-	3.0	↗	n.r.	n.r.	-	n.r.	n.r.	n.r.	63	12	72.1	5.2	0	0.3
Kripner	1998	Czech Rep.	0.903	1994-1997	R	BU	1	345	0-15	-	-	n.r.	-	n.r.	1.4	-	n.r.	(a, b) NS=73	n.r.	n.r.	n.r.	n.r.	n.r.	n.r.	n.r.
Cronin	1996	Ireland	0.965	1992-1993	P	BU	1	57	0-15	-	-	n.r.	-	n.r.	1.8	-	n.r.	n.r.	3.3	61	25	64	n.r.	1.2	1.2
Dedovic	1996	Czech Rep.	0.903	1991-1993	R	BU	1	927	0-15	-	-	3.1	-	n.r.	1	-	n.r.	n.r.	n.r.	64	17	72	2	2	2
Mercier	1996	France	0.961	1991-1992	R	BU with paediatric dept. or paediatric surgery dept.	14*+18°	937	0-15	-	-	n.r.	-	n.r.	1.2	-	(a) 3.9, (b) 2.2	(a) 11	n.r.	62	17	64	9	n.r.	7
Eadie	1995	UK	0.947	1991-1991	R	BU	1	146	0-15	Scalds	-	scalds:0.3-0.5(↗)	-	n.r.	n.r.	-	n.r.	n.r.	n.r.	60	n.r.	100	n.r.	n.r.	n.r.
Chapman	1994	UK-Scotland	0.947	1988-1990	R	ED/BU	1	317	0-12	-	-	n.r.	↘	29	n.r.	↘	n.r.	n.r.	n.r.	61	2	73	17	n.r.	n.r.
Enescu	1994	Romania	0.837	1988-1992	R	BU	1	4327	0-16	-	-	n.r.	↘	n.r.	5.8	↘	n.r.	n.r.	n.r.	59	20	61	9	5	5
Zeitlin	1993	Finland	0.959	1964-1987	R	Dept of Ped surgery (only referral centre for paediatric burns in the region)	1	359	0-16	-	-	n.r.	↘	n.r.	0.3	-	(a) 2.8	n.r.	n.r.	59	10 (incl contact)	81	-	n.r.	0
Benito	1991	Spain	0.955	n.r. (4y)	R	BU	1	710	0-15	-	-	n.r.	-	n.r.	2.1	-	(a) 4.4	(a) 10	n.r.	60	5	61	1	n.r.	2
Lindblad	1990	Denmark	0.955	n.r. (1y)	P	ED	2	5	0-15	Domestic burns	-	2.4	-	n.r.	n.r.	-	n.r.	n.r.	n.r.	61	4	35	46	2	n.r.
Vipulendran	1989	UK	0.947	1983-1987	R	BU	1	600	0-15	(i)Asian;(ii)Non-Asian	-	n.r.	-	n.r.	n.r.	-	n.r.	n.r.	n.r.	(i)62; (ii)60	(i)1.9-(ii)1.3	(i)73-(ii)75	(i&ii)4	(i)0-(ii)1.1	(i)1.3-(ii)2.5
Bradshaw	1988	UK	0.947	1960-1964;1979-1984	R	BU	1	390	0-5	Scalds	-	n.r.	-	n.r.	n.r.	-	n.r.	n.r.	n.r.	n.r.	-	100	-	-	-
Klasen	1986	Netherlands	0.964	1972-1985	R	BU	**	n.r.	0-15	-	-	n.r.	-	n.r.	n.r.	-	n.r.	n.r.	n.r.	64	21	64	12	n.r.	n.r.
Lyngdorf	1986	Denmark	0.955	1982-1983	P	BU	1	18	0-5	Scalds	-	n.r.	↘	n.r.	n.r.	-	n.r.	n.r.	n.r.	59	-	100	-	-	-
Khadim	2009	UK-N.Ireland	0.947	1996-2005	R	BU	1	147	³65	-	Isolated electrical or inhalation injury	n.r.	-	n.r.	12.6	-	(a-b) 77	(a) 8; (b) 3	14.3	38	Burn/Scalds=2/1		n.r.	n.r.	n.r.
Lumenta	2008	France	0.961	1990-2003	R	BU	1	265	³65	-	-	n.r.	-	n.r.	30.6	-	(a) 77	(a) 17, (b) 10	17.7	40	65	31	n.r.	0.4	1.1
Rao	2006	UK	0.947	1999-2003	R	BU	1	63	³65	-	-	n.r.	-	n.r.	34.9	-	(a) 80, (b) 81	(a) 10	12.7	n.r.	49	37	14	n.r.	n.r.
Klosova	2005	Czech Rep.	0.903	1999-2003	R	BU	1	67	³75	-	-	n.r.	-	n.r.	26.9	-	n.r.	(a) 9 (NS=22)	5.9	39	31	43	8	n.r.	n.r.
Desouches	2000	France	0.961	1990-1997	R	BU	2	299	>65	-	-	n.r.	-	n.r.	35.1	-	(a) 77-78	n.r.	15.9	n.r.	n.r.	n.r.	n.r.	n.r.	n.r.
Koupil	2000	Czech Rep.	0.903	1990-1999	R	BU	1	137	>60	-	-	n.r.	-	n.r.	21	-	(a) M=71, F=75	n.r.	n.r.	34	28	58	10	n.r.	n.r.
Cutillas	1998	France	0.961	1981-1996	R	BU	1	716	³60	-	-	n.r.	-	n.r.	39	-	(a) 72	(a) M=31 ; F=37	n.r.	45	51	33	5	4	1
Bortolani	1997	Italy	0.951	1991-1995	R	BU	1	386	³60	-	-	n.r.	-	n.r.	32.1	-	n.r.	(a) 20	n.r.	51	55	15	n.r.	n.r.	2
Sarhadi_2	1995	UK-Scotland	0.947	1970-1992	R	BU	1	176	³65	-	-	n.r.	-	n.r.	12.5	-	n.r.	n.r.	n.r.	39	35	38	25	2
Tejerina	1992	Spain	0.955	1988-1991	R	BU	1	69	³60	-	-	n.r.	-	n.r.	33.3	-	(a) 72	(a) 22	n.r.	42	65	17	15	n.r.	3
Zoch_2	1992	Austria	0.955	1980-1988	R	BU	1	124	>65	(i) '80-'86;(ii):'87-'90	-	n.r.	-	n.r.	(i.):69; (ii.):35	↘	(a) 78	(a) (i.)28; (ii)22	n.r.	n.r.	n.r.	n.r.	n.r.	n.r.	n.r.
BOBI, Belgian Outcome in Burn Injury Study Group; P, Prospective; R, Retrospective; ED, Emergency Department; n.r., not reported; S, Survivors; NS, Non-survivors; M, male; F, Female
* All national (pediatric) burn units, ** nationwide data: based on national registers or registration systems etc. (may also include hospitals without specialised burn unit)
° Pediatric surgical departments; #also includes patients with secondary diagnosis of burns; ⁺ only patients with burns and inhalation injury
Incidence trends: reported as increase (↗) or decrease (↘) in incidence (and /or annual number of admitted patients)
Mortality trends: reported as increase (↗) or decrease (↘)
ICD, International Classification of diseases
